# Supplementary material for: Surface-enhanced Raman scattering for HSP 70A mRNA detection in live cells using silica nanoparticles and DNA-modified gold nanoparticles
Source: Royal Society of Chemistry journal article supplement (doi:10.1039/d4tb01514b), 2024-11-08
Supplement: d4tb01514b1.pdf [file d4tb01514b1.pdf]

## Supporting Information

# Surface-Enhanced Raman Scattering for HSP 70A mRNA Detection in the Live Cells Using Silica Nanoparticles and DNA-Modified Gold Nanoparticles

*Ju Eun Cho<sup>a</sup> and Dong-Kwon Lim<sup>a, b, c, \*</sup>*

<sup>a</sup>KU-KIST Graduate School of Converging Science and Technology, Korea University, 145 Anam-ro, Seongbuk-gu, Seoul 02841, Republic of Korea

<sup>b</sup>Department of Integrative Energy Engineering, College of Engineering, Korea University, 145 Anam-ro, Seongbuk-gu, Seoul 02841, Republic of Korea.

<sup>c</sup>Brain Science Institute, Korea Institute of Science and Technology (KIST), Hwarang-ro 14-gil, Seongbuk-gu, Seoul 02792, Republic of Korea.

\*Correspondence: [dklim@korea.ac.kr](mailto:dklim@korea.ac.kr)

## Materials

Silica nanoparticles (SiNPs, 50 nm) were purchased from Microsphere Nanospheres (Cold Spring, NY, USA). Citrate-capped gold nanoparticles (AuNPs, 50 nm) were purchased from BBI solution (Madison, WI, USA). Reagents including 1-ethyl-3-[3-dimethylaminopropyl]carbodiimide (EDC), N-hydroxysulfosuccinimide (NHS), sodium phosphate dibasic anhydride ( $\text{Na}_2\text{HPO}_4$ ), sodium phosphate monobasic dihydrate ( $\text{NaH}_2\text{PO}_4$ ), sodium chloride (NaCl), DL-dithiothreitol (DTT) and sodium dodecyl sulfate were obtained from Sigma-Aldrich (St. Louis, MO, USA).

Target oligonucleotide (HSP 70A mRNA), amine-modified oligonucleotides for SiNPs, thiol-modified oligonucleotide for AuNPs and Cy5 modified oligonucleotide were obtained from Integrated DNA Technologies (IDT Inc., Coralville, IA, USA). DNA purification columns (NAP-5) were purchased from GE Healthcare Life Sciences (Chicago, IL, USA). Dulbecco's Modified Eagle's medium (DMEM), phenol red-free medium (DMEM), and fetal bovine serum (FBS) were purchased from HyClone (Waltham, MA, USA). Dulbecco's phosphate-buffered saline (DPBS; 0.137 M) was purchased from Mediatech Inc. (Manassas, VA, USA). Trypsin and antibiotics were purchased from Gibco (Grand Island, NY, USA).

## Instruments

The extinction spectra of nanoparticles were acquired using a UV-Vis spectrometer (SCINCO, South Korea). Transmission electron microscopy (TEM) was used for size characterization. Fluorescence intensity was measured using a Cytation 3 Cell Imaging Multi-Mode Reader (BioTek Inc., Winooski, USA). Raman spectra of DNA-AuNPs were acquired using a Raman microscope (WEVE, South Korea) with a 40 $\times$  objective lens (Olympus, Tokyo, Japan) and a 785-nm laser (61.2 mW, 1 s exposure time). With a confocal motorized pinhole (100  $\mu\text{m}$ ) directed to a spectrometer (FEX-MD, WEVE, South Korea) (600  $\text{g mm}^{-1}$  grating)

and to the spectroscopy CCD (DV401A- BVF, Belfast, Northern Ireland) all the Raman signals were obtained. Bright-field, dark-field, and fluorescence images were captured using a 40× air objective lens (Olympus, DP80, Tokyo, Japan) and EzScan (WEVE, South Korea) software.

**Table S1.** Sequence information of target mRNA, flare and oligonucleotide.

| Name                      | Sequence                                                                | T <sub>m</sub><br>(°C) |
|---------------------------|-------------------------------------------------------------------------|------------------------|
| Target                    | 5'-TGT CGC AGC AGC TCC TCA GGC TAG-3'                                   | 64.6                   |
| Flare                     | 5'-(Cy5) TGT CGC AGC AGC CCT ACT-3'                                     | 59.2                   |
| Oligonucleotide for SiNPs | 5'-CTA GCC TGA GGA GCT GCT GCG ACA-A <sub>10</sub> -NH <sub>2</sub> -3' | 64.6                   |
| Oligonucleotide for AuNPs | 5'-ATC AGT AGT AGG GCT GCT GCG ACA-A <sub>10</sub> -SH-3'               | 61.8                   |

**Table S2.** Raman band assignment. [1]

| Wavenumber (cm <sup>-1</sup> ) | Raman band assignment |
|--------------------------------|-----------------------|
| 540–600                        | Amide VI              |
| 605                            | Cytochrome            |
| 625–800                        | Amide IV, V           |
| 753                            | Cytochromes           |
| –800                           | Phosphoric acid       |
| 1000                           | Phenylalanine         |
| 1130                           | Cytochrome            |
| 1230–1300                      | Amide III             |
| 1314                           | Cytochrome            |
| 1451                           | CH <sub>2</sub>       |
| 1480–1540                      | Amide II              |
| 1585                           | Cytochromes           |
| –1660                          | C=C, C=O, Amide I     |

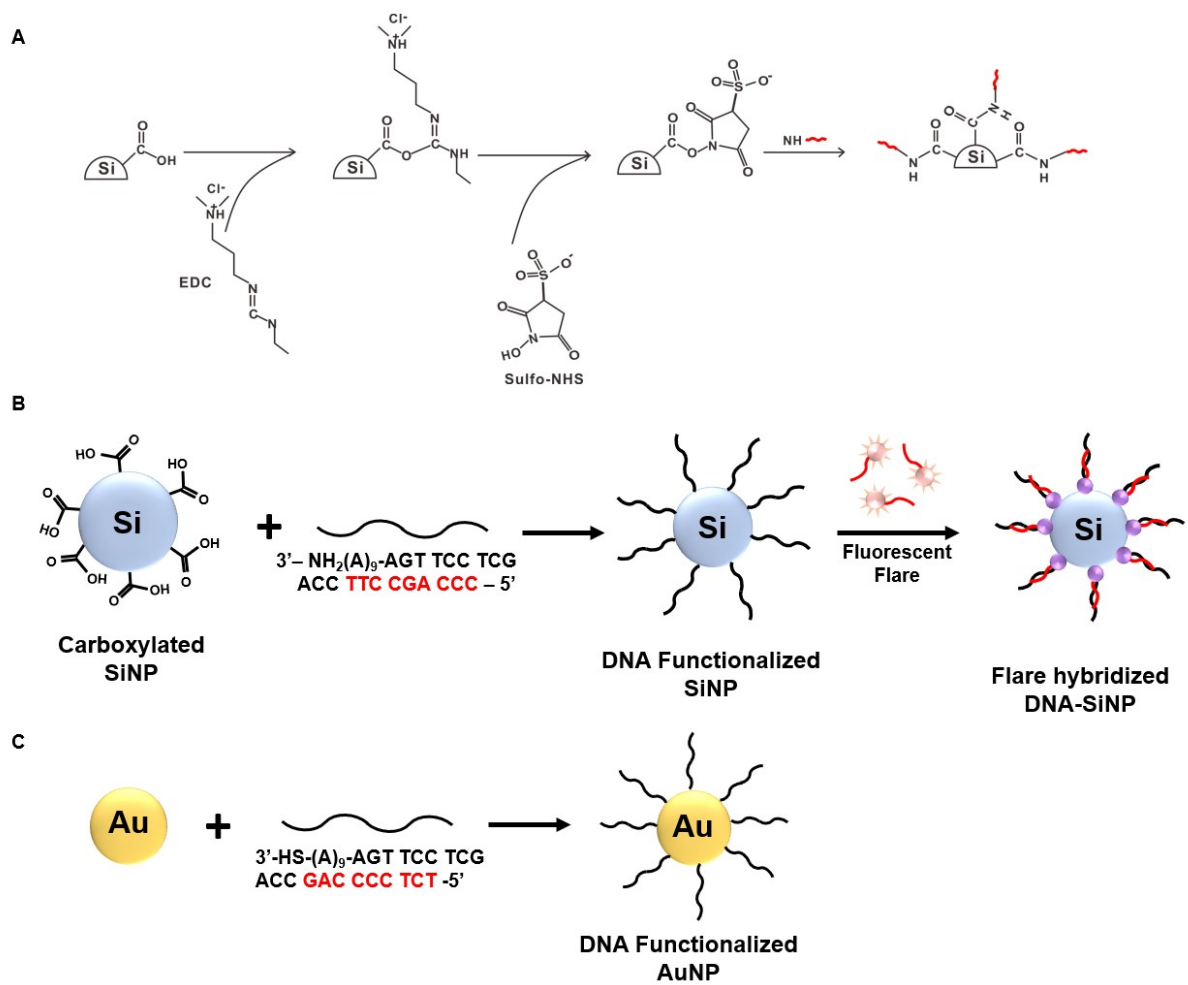

**Figure S1.** Schematic illustration of nanoparticles preparation. (A) Schematic representation of EDC/NHS coupling. (B) Preparation of flare hybridized DNA-SiNPs. (C) Conjugation of DNA with AuNPs.

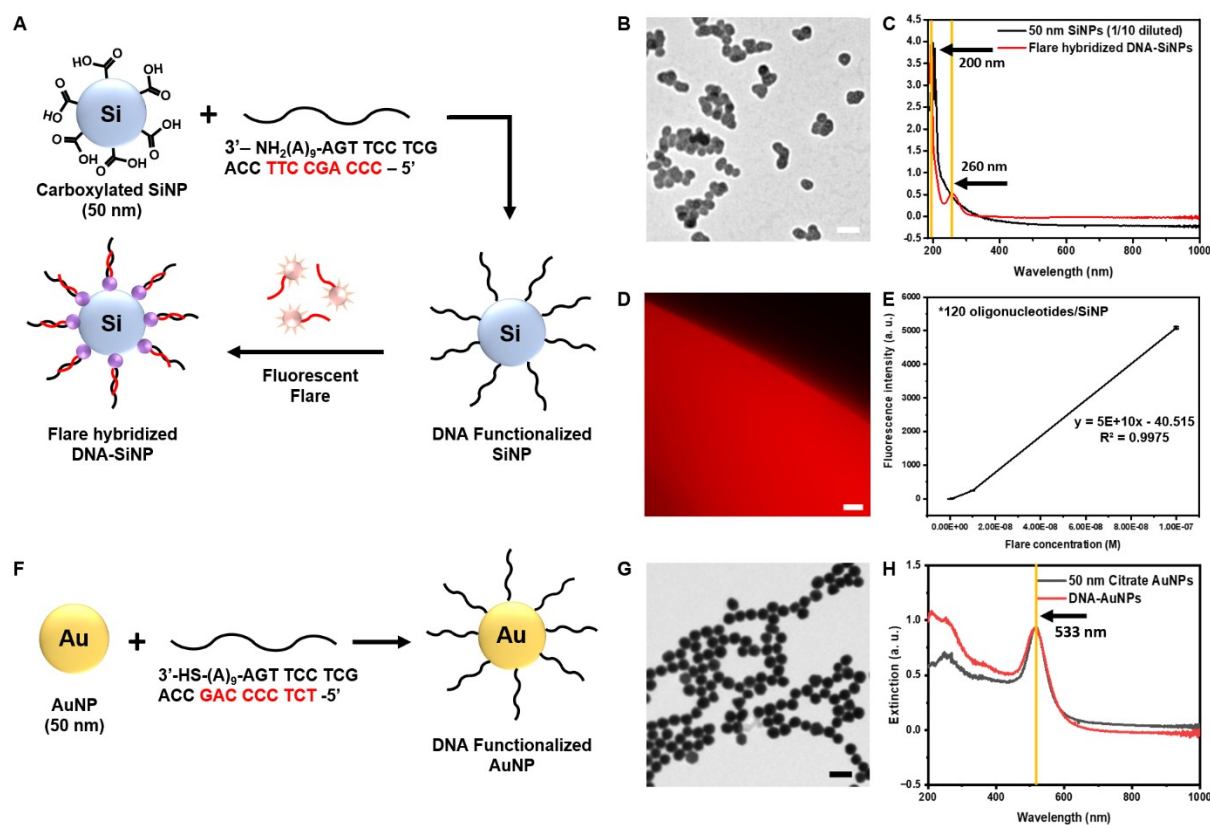

**Figure S2.** Characterization of nanoparticles. (A) Scheme for the preparation of flare hybridized DNA-SiNPs. (B) TEM image of the SiNPs (scale bar = 100 nm). (C) UV-Vis spectrum of SiNPs and Flare hybridized DNA-SiNPs. (D) Fluorescence image of the flare hybridized DNA-SiNPs (scale bar = 20 μm). (E) The number of oligonucleotides conjugated per SiNP. (F) Scheme for DNA conjugation with AuNPs. (G) TEM image of AuNPs (scale bar = 100 nm). (H) UV-Vis spectra of AuNPs and DNA-AuNPs.

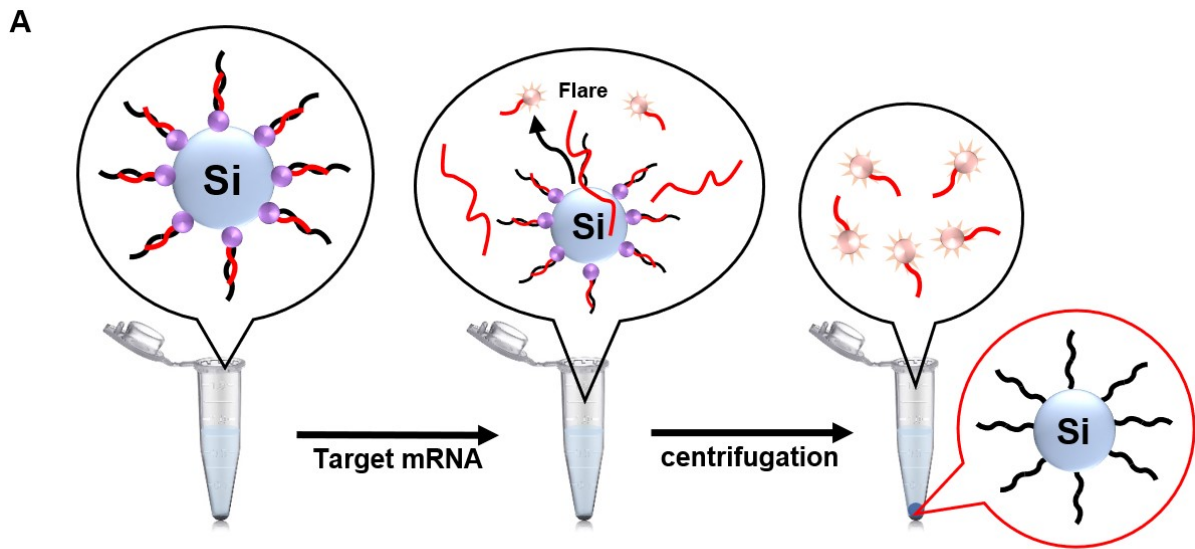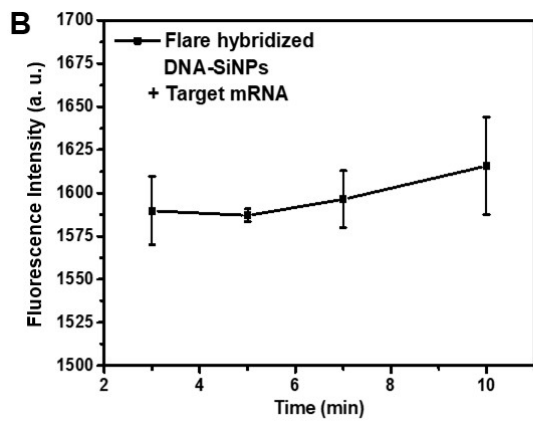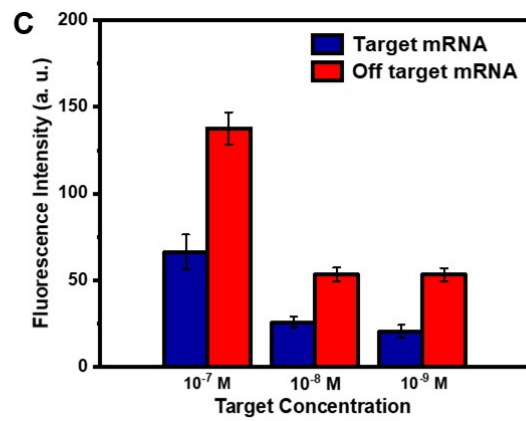

**Figure S3.** Test tube-based study of flare hybridized DNA-SiNPs. (A) Schematic illustration of procedure. (B) Fluorescence changes in the flare hybridized DNA-SiNPs following the addition of the target mRNA. (C) Selectivity of flare hybridized DNA-SiNPs to the target.

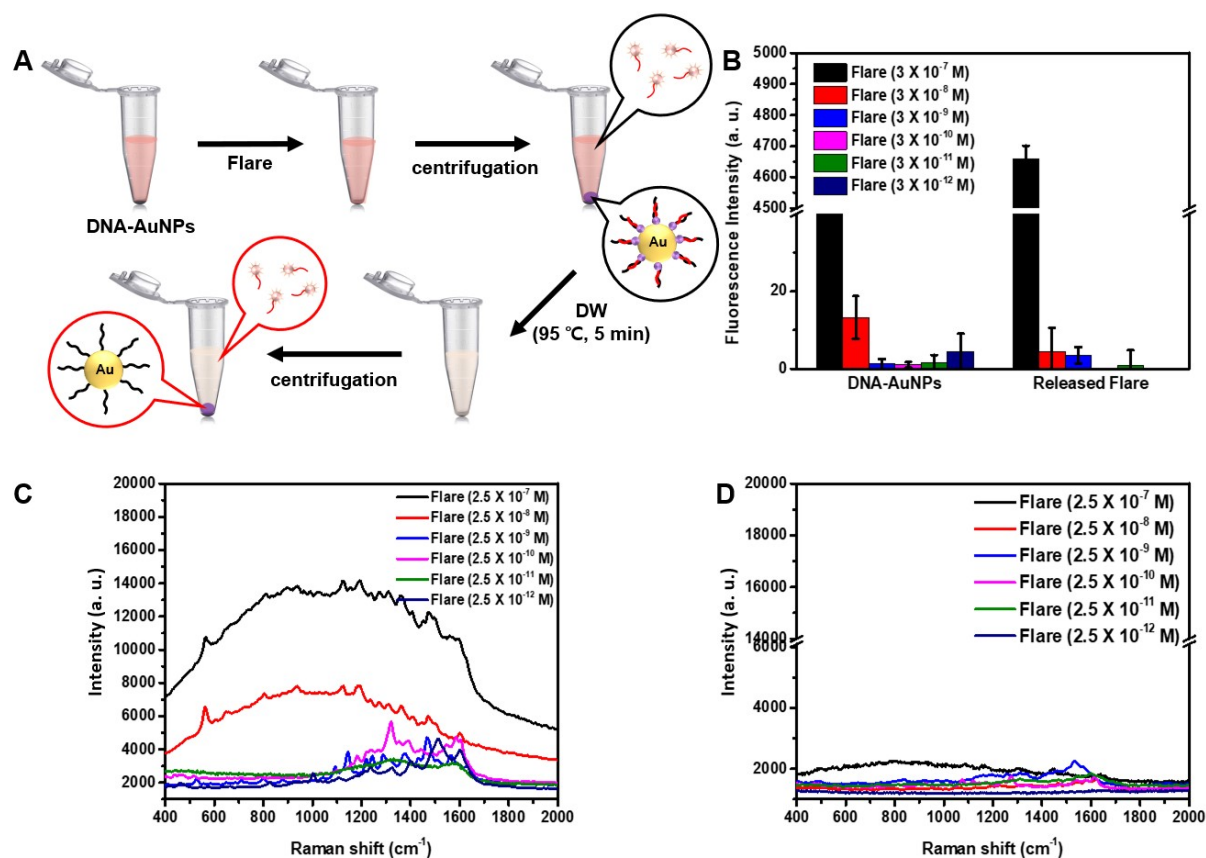

**Figure S4.** Test tube-based study of DNA-AuNPs. (A) Schematic illustration of procedure. (B) Fluorescence intensity of DNA-AuNPs and released flares after reaction with different flare concentrations. (C) Raman signals of flare-hybridized DNA-AuNPs depending on flare concentration. (D) Raman signals of DNA-AuNPs after flare release.



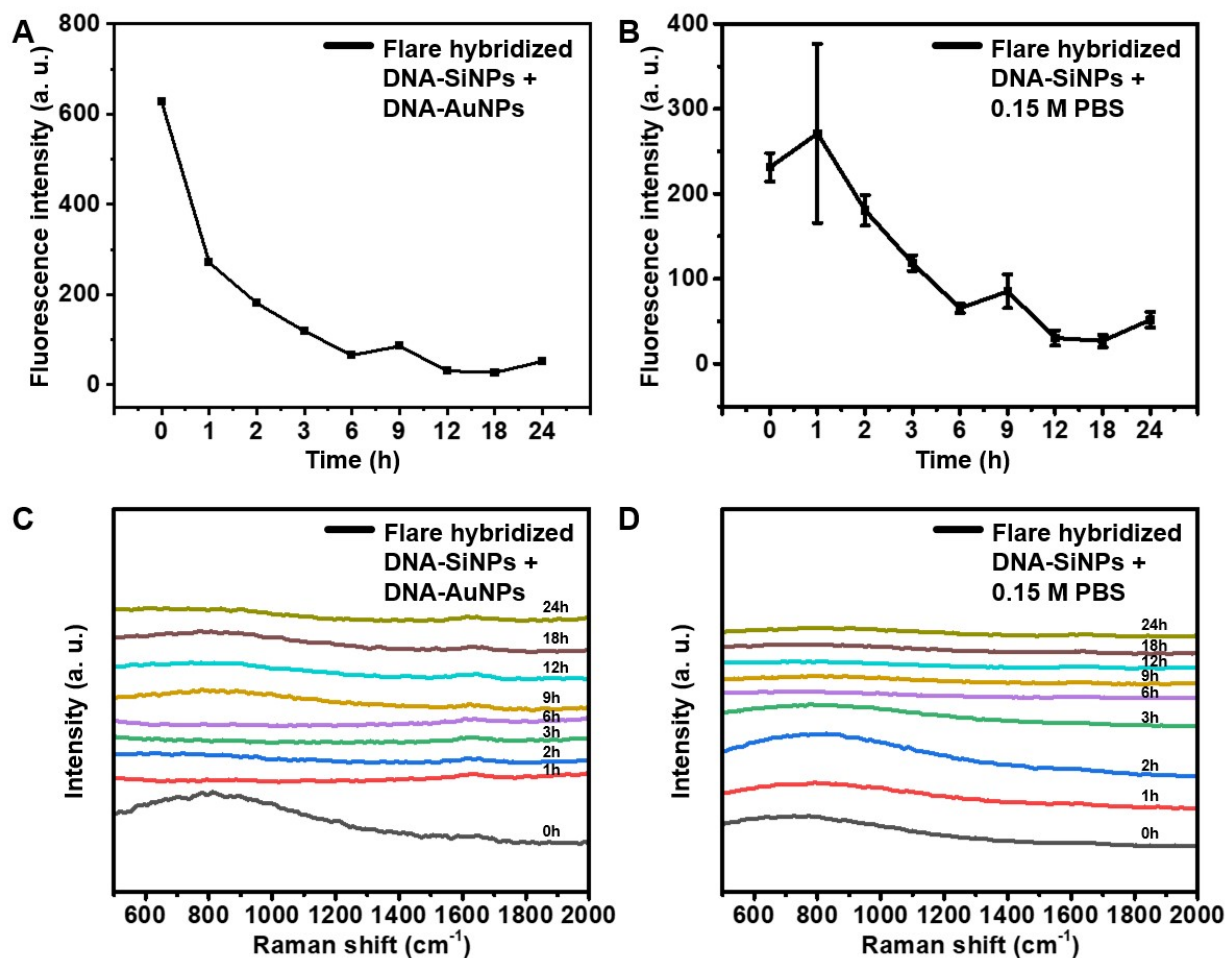

**Figure S5.** Control experiment (without target). (A) Fluorescence intensity change in flare-hybridized DNA-SiNP and DNA-AuNP solutions without the target. (B) Fluorescence intensity change of flare-hybridized DNA-SiNPs and 0.15 M PBS without the target. (C) Raman signals of flare-hybridized DNA-SiNP and DNA-AuNP solutions without the target. (D) Raman signals of flare-hybridized DNA-SiNPs and 0.15 M PBS without the target.

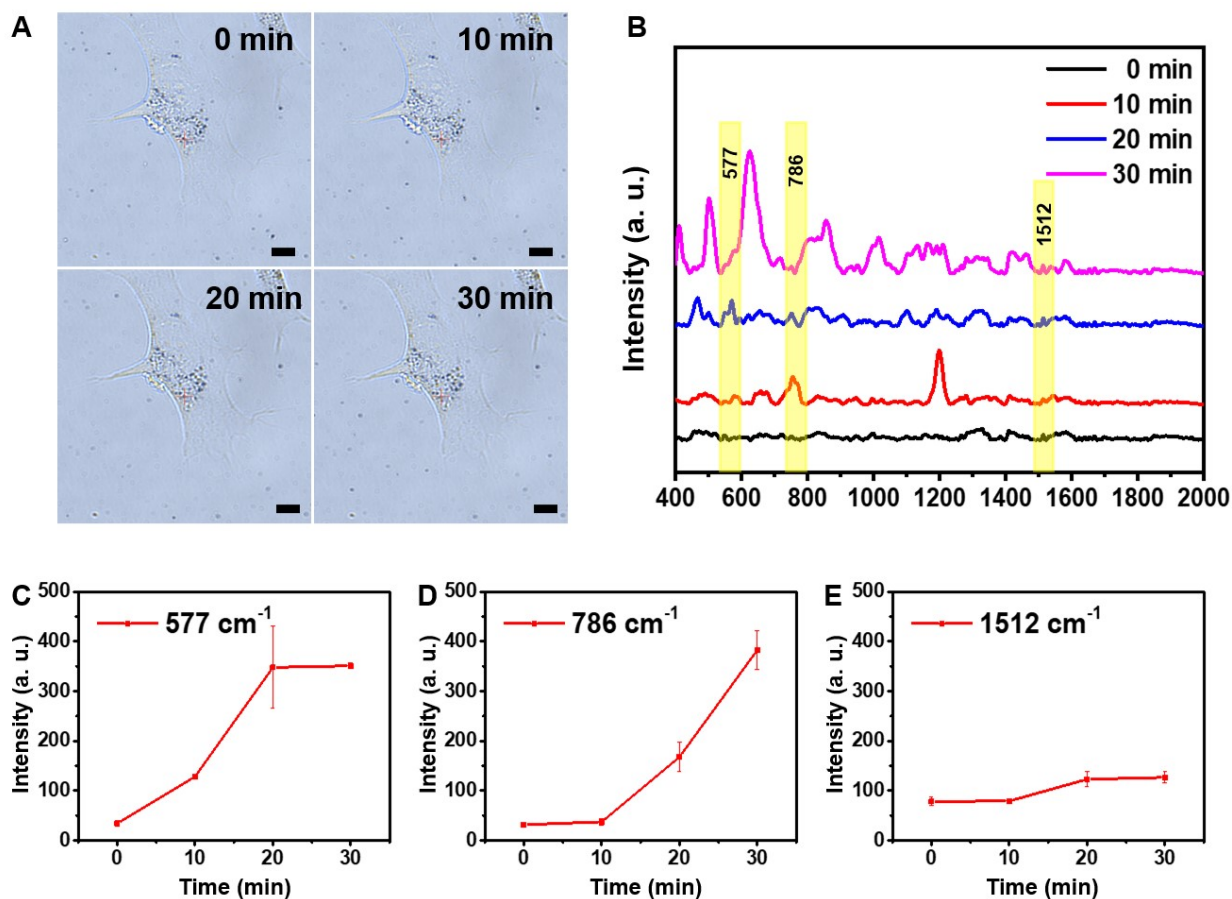

**Figure S6.** Raman signal changes in cell by photothermal damage. (A) Bright-field image of HeLa cells with AuNPs (scale bar = 20  $\mu\text{m}$ ). (B) Raman signal changes after 1 s of irradiation. (C) Raman signal intensity changes at 577  $\text{cm}^{-1}$ , (D) 786  $\text{cm}^{-1}$ , (E) 1512  $\text{cm}^{-1}$  with time (0 min – 30 min).

## Reference

- [1] K. Dodo, K. Fujita, M. Sodeoka, *J. Am. Chem. Soc.* 144 (2022) 19651-19667.
